# Supplementary material
Source: ML conference proceedings conference paper supplement (https://openreview.net/forum?id=y5B0ca4mjt)
Supplement: supplementary_material [file attachment]

**Jax gpu version installation**

**Please follow the steps below.**

pip install jaxlib==0.3.25+cuda11.cudnn82 -f https://storage.googleapis.com/jax-releases/jax_cuda_releases.html

[pip install jax==0.3.25](https://jax.readthedocs.io/en/latest/index.html" \o "previous page)

pip install --upgrade numpy==1.24.2

pip install --upgrade scipy==1.12.0

pip install optax==0.1.0

pip install tqdm

pip install flax==0.4.1

pip install --upgrade optax==0.1.1

pip install --upgrade optax==0.1.2

pip install ml_collections

pip install wandb

pip install tabulate

<pip install torch>

If cuda (11.3)

conda install pytorch==1.12.1 torchvision==0.13.1 torchaudio==0.12.1 cudatoolkit=11.3 -c pytorch

if cuda (11.8)

conda install pytorch==2.3.1 torchvision==0.18.1 torchaudio==2.3.1 pytorch-cuda=11.8 -c pytorch -c nvidia

if cuda (11.4)

conda install pytorch==1.11.0 torchvision==0.12.0 torchaudio==0.11.0 cudatoolkit=11.3 -c pytorch

pip install tensorflow[and-cuda]
